# Supplementary material
Source: PubMed Central journal article supplement (PMC6037927)
Supplement: tom-00211-16-s001.pdf [file tom-00211-16-s001.pdf]

# Deep Feature Transfer Learning in Combination with Traditional Features Predicts Survival among Patients with Lung Adenocarcinoma

Rahul Paul<sup>1</sup>, Samuel H. Hawkins<sup>1</sup>, Y. Balagurunathan<sup>2</sup>, Matthew B. Schabath<sup>2,3</sup>, Robert J. Gillies<sup>2</sup>, Lawrence O. Hall<sup>1</sup>, Dmitry B. Goldgof<sup>1</sup>

<sup>1</sup>Department of Computer Science and Engineering, University of South Florida, Tampa, Florida, USA

<sup>2</sup>Department of Cancer Imaging and Metabolism, H. Lee Moffitt Cancer Center and Research Institute, Tampa, Florida, USA

<sup>3</sup>Department of Cancer Epidemiology, H. Lee Moffitt Cancer Center and Research Institute, Tampa, Florida, USA

## Abstract

Lung cancer is the most common cause of cancer related deaths in the US (1). It can be detected and diagnosed with the help of computed tomography (CT) images. For an automated classifier, identifying predictive features from medical images is a key concern. Deep feature extraction using pre-trained convolutional neural networks has recently been successful when applied in some image domains. In this paper, we applied a pre-trained convolutional neural network (CNN) to extract deep features from 40 contrast CT images of non-small cell adenocarcinoma lung cancer, combined deep features with traditional image features and trained classifiers to predict short and long term survivors. We experimented with several pre-trained CNNs and several feature selection strategies.

The best previously reported accuracy while using traditional quantitative features was 77.5% (16) (AUC 0.712) and was achieved by a decision tree classifier. The best reported accuracy from transfer learning and deep features was 77.5% (40) (AUC 0.713) as well and was achieved by a decision tree classifier. When we combined extracted deep neural network features along with traditional quantitative features we obtained an accuracy of 90% (AUC 0.935) with the five best post-relu features extracted from a vgg-f pre-trained CNN and the 5 best traditional features. The best results were achieved with the symmetric uncertainty feature ranking algorithm followed by random forest classifier.

**Results:** Here we present all the results obtained using various pre-trained CNN architectures and classifiers and feature selectors.

### A. Results obtained from pre-relu features

TABLE IV. Accuracies from warped tumor patches using vgg-f network

| Classifier used               | <i>Symmetric uncertainty feature selector</i> | <i>AUC</i> | <i>Relief-f feature selector</i> | <i>AUC</i> |
|-------------------------------|-----------------------------------------------|------------|----------------------------------|------------|
| Naïve bayes (5 features )     | 72.5%                                         | 0.773      | 57.5%                            | 0.566      |
| Naïve bayes (10 features )    | 57.5%                                         | 0.575      | 60%                              | 0.589      |
| Nearest neighbor(5 features)  | 67.5%                                         | 0.675      | 70%                              | 0.596      |
| Nearest neighbor(10 features) | 57.5%                                         | 0.566      | 62.5%                            | 0.525      |
| Decision tree(5 features)     | 67.5%                                         | 0.675      | 70%                              | 0.724      |
| Decision tree(10 features)    | 65%                                           | 0.654      | 62.5%                            | 0.666      |
| Random Forests(5 features)    | <b>75%</b>                                    | 0.75       | 70%                              | 0.77       |
| Random Forests(10 features)   | 72.5%                                         | 0.645      | 65%                              | 0.654      |

Table V. Accuracies from cropped (40x40) tumor patches using vgg-f network

| Classifier used               | <i>Symmetric uncertainty feature selector</i> | <i>AUC</i> | <i>Relief-f feature selector</i> | <i>AUC</i>  |
|-------------------------------|-----------------------------------------------|------------|----------------------------------|-------------|
| Naïve bayes (5 features )     | 65%                                           | 0.617      | 55%                              | 0.638       |
| Naïve bayes (10 features )    | 47.5%                                         | 0.436      | 57.5%                            | 0.575       |
| Nearest neighbor(5 features)  | 45%                                           | 0.403      | 52.5%                            | 0.513       |
| Nearest neighbor(10 features) | 55%                                           | 0.563      | 42.5%                            | 0.253       |
| Decision tree(5 features)     | 65%                                           | 0.654      | <b>75%</b>                       | <b>0.75</b> |
| Decision tree(10 features)    | 60%                                           | 0.589      | 65%                              | 0.617       |
| Random Forests(5 features)    | 50%                                           | 0.5        | 65%                              | 0.654       |
| Random Forests(10 features)   | 60%                                           | 0.589      | 55%                              | 0.555       |

Table VI. Accuracies from cropped (56x56) tumor patches using vgg-f network

| Classifier used               | <i>Symmetric uncertainty feature selector</i> | <i>AUC</i> | <i>Relief-f feature selector</i> | <i>AUC</i> |
|-------------------------------|-----------------------------------------------|------------|----------------------------------|------------|
| Naïve bayes (5 features )     | 47.5%                                         | 0.475      | 55%                              | 0.638      |
| Naïve bayes (10 features )    | 60%                                           | 0.589      | 52.5%                            | 0.513      |
| Nearest neighbor(5 features)  | 62.5%                                         | 0.666      | 52.5%                            | 0.523      |
| Nearest neighbor(10 features) | 72.5%                                         | 0.725      | 57.5%                            | 0.566      |
| Decision tree(5 features)     | 70%                                           | 0.724      | 67.5%                            | 0.675      |
| Decision tree(10 features)    | <b>77.5%</b>                                  | 0.713      | 40%                              | 0.4        |
| Random Forests(5 features)    | 72.5%                                         | 0.725      | 67.5%                            | 0.675      |
| Random Forests(10 features)   | 72.5%                                         | 0.645      | 55%                              | 0.555      |

Table VII. Accuracies by merging warped (vgg-F) and quantitative features from [16]

| Classifier used  | <i>Symmetric uncertainty feature selector</i> | <i>AUC</i> | <i>Relief-f feature selector</i> | <i>AUC</i> |
|------------------|-----------------------------------------------|------------|----------------------------------|------------|
| Naïve bayes      | 70%                                           | 0.724      | 72.5%                            | 0.645      |
| Nearest neighbor | 67.5%                                         | 0.675      | 65%                              | 0.654      |
| Decision tree    | 75%                                           | 0.75       | 72.5%                            | 0.645      |
| Random Forests   | <b>80%</b>                                    | 0.8        | 77.5%                            | 0.7        |

Table VIII. Accuracies by merging cropped (40x40) (vgg-F) and quantitative features from [16]

| Classifier used  | <i>Symmetric uncertainty feature selector</i> | <i>AUC</i> | <i>Relief-f feature selector</i> | <i>AUC</i> |
|------------------|-----------------------------------------------|------------|----------------------------------|------------|
| Naïve bayes      | 60%                                           | 0.589      | 75%                              | 0.75       |
| Nearest neighbor | 65%                                           | 0.654      | 67.5%                            | 0.675      |
| Decision tree    | 72.5%                                         | 0.773      | 72.5%                            | 0.725      |
| Random Forests   | <b>80%</b>                                    | 0.8        | 75%                              | 0.75       |

Table IX. Accuracies by merging cropped (56x56) (vgg-F) and quantitative features from [16]

| Classifier used  | <i>Symmetric uncertainty feature selector</i> | <i>AUC</i> | <i>Relief-f feature selector</i> | <i>AUC</i> |
|------------------|-----------------------------------------------|------------|----------------------------------|------------|
| Naïve bayes      | 62.5%                                         | 0.666      | 67.5%                            | 0.675      |
| Nearest neighbor | <b>82.5%</b>                                  | 0.778      | 65%                              | 0.617      |
| Decision tree    | 80%                                           | 0.651      | 75%                              | 0.75       |
| Random Forests   | 80%                                           | 0.8        | 75%                              | 0.75       |

Table X. Accuracies from warped tumor patches using vgg-m pre-trained network

| Classifier used               | <i>Symmetric uncertainty feature selector</i> | <i>AUC</i> | <i>Relief-f feature selector</i> | <i>AUC</i>   |
|-------------------------------|-----------------------------------------------|------------|----------------------------------|--------------|
| Naïve bayes (5 features )     | 25%                                           | 0.188      | 45%                              | 0.378        |
| Naïve bayes (10 features )    | 27.5%                                         | 0.203      | 52.5%                            | 0.548        |
| Nearest neighbor(5 features)  | 30%                                           | 0.30       | 47.5%                            | 0.475        |
| Nearest neighbor(10 features) | 35%                                           | 0.35       | <b>57.5%</b>                     | <b>0.575</b> |
| Decision tree(5 features)     | 37.5%                                         | 0.33       | 35%                              | 0.35         |
| Decision tree(10 features)    | 40%                                           | 0.353      | 20%                              | 0.194        |
| Random Forests(5 features)    | 30%                                           | 0.286      | 45%                              | 0.403        |
| Random Forests(10 features)   | 32.5%                                         | 0.295      | 52.5%                            | 0.495        |

Table XI. Accuracies from cropped (40x40) tumor patches using vgg-m pre-trained network

| Classifier used               | <i>Symmetric uncertainty feature selector</i> | <i>AUC</i> | <i>Relief-f feature selector</i> | <i>AUC</i> |
|-------------------------------|-----------------------------------------------|------------|----------------------------------|------------|
| Naïve bayes (5 features )     | 52.5%                                         | 0.483      | 65%                              | 0.675      |
| Naïve bayes (10 features )    | 55%                                           | 0.513      | <b>67.5%</b>                     | 0.60       |
| Nearest neighbor(5 features)  | 47.5%                                         | 0.475      | 62.5%                            | 0.625      |
| Nearest neighbor(10 features) | 47.5%                                         | 0.475      | 65%                              | 0.65       |
| Decision tree(5 features)     | 40%                                           | 0.323      | 57.5%                            | 0.54.      |
| Decision tree(10 features)    | 37.5%                                         | 0.299      | 52.5%                            | 0.553      |
| Random Forests(5 features)    | 50%                                           | 0.444      | 62.5%                            | 0.704      |
| Random Forests(10 features)   | 47.5%                                         | 0.436      | 62.5%                            | 0.675      |

Table XII. Accuracies from cropped (56x56) tumor patches using vgg-m pre-trained network

| Classifier used               | <i>Symmetric uncertainty feature selector</i> | <i>AUC</i> | <i>Relief-f feature selector</i> | <i>AUC</i> |
|-------------------------------|-----------------------------------------------|------------|----------------------------------|------------|
| Naïve bayes (5 features )     | 45%                                           | 0.393      | 57.5%                            | 0.543      |
| Naïve bayes (10 features )    | 50%                                           | 0.463      | 52.5%                            | 0.495      |
| Nearest neighbor(5 features)  | 47.5%                                         | 0.475      | 47.5%                            | 0.475      |
| Nearest neighbor(10 features) | 55%                                           | 0.55       | 50%                              | 0.50       |
| Decision tree(5 features)     | 40%                                           | 0.369      | <b>60%</b>                       | 0.455      |
| Decision tree(10 features)    | 50%                                           | 0.468      | 55%                              | 0.386      |
| Random Forests(5 features)    | 45%                                           | 0.394      | 52.5%                            | 0.505      |
| Random Forests(10 features)   | 45%                                           | 0.516      | 52.5%                            | 0.477      |

Table XIII. Accuracies by merging warped (vgg-m) and quantitative features from [16]

| Classifier used  | <i>Symmetric uncertainty feature selector</i> | <i>AUC</i> | <i>Relief-f feature selector</i> | <i>AUC</i> |
|------------------|-----------------------------------------------|------------|----------------------------------|------------|
| Naïve bayes      | 42.5%                                         | 0.253      | 65%                              | 0.698      |
| Nearest neighbor | 55%                                           | 0.55       | 60%                              | 0.60       |
| Decision tree    | 60%                                           | 0.569      | 45%                              | 0.49       |
| Random Forests   | <b>62.5%</b>                                  | 0.686      | 60%                              | 0.676      |

Table XIV. Accuracies by merging cropped(40x40) (vgg-m) and quantitative features from [16]

| Classifier used  | <i>Symmetric uncertainty feature selector</i> | <i>AUC</i> | <i>Relief-f feature selector</i> | <i>AUC</i>   |
|------------------|-----------------------------------------------|------------|----------------------------------|--------------|
| Naïve bayes      | 50%                                           | 0.403      | 60%                              | 0.53         |
| Nearest neighbor | 40%                                           | 0.40       | 50%                              | 0.50         |
| Decision tree    | 42.5%                                         | 0.341      | <b>77.5%</b>                     | <b>0.713</b> |
| Random Forests   | 62.5%                                         | 0.605      | 62.5%                            | 0.579        |

Table XV. Accuracies by merging cropped (56x56) (vgg-m) and quantitative features from [16]

| Classifier used  | <i>Symmetric uncertainty feature selector</i> | <i>AUC</i> | <i>Relief-f feature selector</i> | <i>AUC</i> |
|------------------|-----------------------------------------------|------------|----------------------------------|------------|
| Naïve bayes      | 42.5%                                         | 0.333      | 65%                              | 0.635      |
| Nearest neighbor | 42.5%                                         | 0.425      | 62.5%                            | 0.625      |
| Decision tree    | 57.5%                                         | 0.40.4     | <b>70%</b>                       | 0.641      |
| Random Forests   | 62.5%                                         | 0.609      | 57.5%                            | 0.599      |

Table XVI. Accuracies from warped tumor patches using vgg-s pre-trained network

| Classifier used               | <i>Symmetric uncertainty feature selector</i> | <i>AUC</i> | <i>Relief-f feature selector</i> | <i>AUC</i>  |
|-------------------------------|-----------------------------------------------|------------|----------------------------------|-------------|
| Naïve bayes (5 features )     | 40%                                           | 0.323      | 42.5%                            | 0.425       |
| Naïve bayes (10 features )    | 42.5%                                         | 0.341      | 45%                              | 0.49        |
| Nearest neighbor(5 features)  | 37.5%                                         | 0.299      | 45%                              | 0.394       |
| Nearest neighbor(10 features) | 35%                                           | 0.35       | <b>50%</b>                       | <b>0.50</b> |
| Decision tree(5 features)     | 20%                                           | 0.188      | 40%                              | 0.369       |
| Decision tree(10 features)    | 25%                                           | 0.194      | 32.5%                            | 0.302       |
| Random Forests(5 features)    | 32.5%                                         | 0.295      | 35%                              | 0.35        |
| Random Forests(10 features)   | 37.5%                                         | 0.33       | 47.5%                            | 0.475       |

Table XVII. Accuracies from cropped (40x40) tumor patches using vgg-s pre-trained network

| Classifier used               | <i>Symmetric uncertainty feature selector</i> | <i>AUC</i> | <i>Relief-f feature selector</i> | <i>AUC</i>  |
|-------------------------------|-----------------------------------------------|------------|----------------------------------|-------------|
| Naïve bayes (5 features )     | 52.5%                                         | 0.483      | 62.5%                            | 0.579       |
| Naïve bayes (10 features )    | 55%                                           | 0.513      | <b>67.5%</b>                     | <b>0.60</b> |
| Nearest neighbor(5 features)  | 37.5%                                         | 0.33       | 57.5%                            | 0.544       |
| Nearest neighbor(10 features) | 47.5%                                         | 0.436      | 60%                              | 0.569       |
| Decision tree(5 features)     | 47.5%                                         | 0.475      | 37.5%                            | 0.299       |
| Decision tree(10 features)    | 45%                                           | 0.516      | 37.5%                            | 0.33        |
| Random Forests(5 features)    | 40%                                           | 0.40       | 55%                              | 0.513       |
| Random Forests(10 features)   | 52.5%                                         | 0.505      | 55%                              | 0.55        |

Table XVIII. Accuracies from cropped (56x56) tumor patches using vgg-s pre-trained network

| Classifier used               | <i>Symmetric uncertainty feature selector</i> | <i>AUC</i> | <i>Relief-f feature selector</i> | <i>AUC</i> |
|-------------------------------|-----------------------------------------------|------------|----------------------------------|------------|
| Naïve bayes (5 features )     | 60%                                           | 0.569      | 72.5%                            | 0.713      |
| Naïve bayes (10 features )    | 42.5%                                         | 0.341      | 60%                              | 0.563      |
| Nearest neighbor(5 features)  | 52.5%                                         | 0.483      | 45%                              | 0.394      |
| Nearest neighbor(10 features) | 55%                                           | 0.513      | 40%                              | 0.353      |
| Decision tree(5 features)     | 60%                                           | 0.60       | <b>75%</b>                       | 0.75       |
| Decision tree(10 features)    | 40%                                           | 0.40       | 60%                              | 0.676      |
| Random Forests(5 features)    | 52.5%                                         | 0.505      | 65%                              | 0.635      |
| Random Forests(10 features)   | 50%                                           | 0.50       | 55%                              | 0.55       |

Table XIX. Accuracies by merging warped (vgg-s) and quantitative features from [16]

| Classifier used  | <i>Symmetric uncertainty feature selector</i> | <i>AUC</i> | <i>Relief-f feature selector</i> | <i>AUC</i> |
|------------------|-----------------------------------------------|------------|----------------------------------|------------|
| Naïve bayes      | 50%                                           | 0.69       | 75%                              | 0.763      |
| Nearest neighbor | 62.5%                                         | 0.625      | 70%                              | 0.70       |
| Decision tree    | 60%                                           | 0.684      | 52.5%                            | 0.525      |
| Random Forests   | <b>80%</b>                                    | 0.875      | 72.5%                            | 0.783      |

Table XX. Accuracies by merging cropped (40x40) (vgg-s) and quantitative features from [16]

| Classifier used  | <i>Symmetric uncertainty feature selector</i> | <i>AUC</i> | <i>Relief-f feature selector</i> | <i>AUC</i>  |
|------------------|-----------------------------------------------|------------|----------------------------------|-------------|
| Naïve bayes      | 75%                                           | 0.778      | <b>82.5%</b>                     | <b>0.83</b> |
| Nearest neighbor | 50%                                           | 0.50       | 70%                              | 0.70        |
| Decision tree    | 65%                                           | 0.698      | 57.5%                            | 0.575       |
| Random Forests   | 67.5%                                         | 0.744      | 72.5%                            | 0.725       |

Table XXI. Accuracies by merging cropped (56x56) (vgg-s) and quantitative features from [16]

| Classifier used  | <i>Symmetric uncertainty feature selector</i> | <i>AUC</i> | <i>Relief-f feature selector</i> | <i>AUC</i>   |
|------------------|-----------------------------------------------|------------|----------------------------------|--------------|
| Naïve bayes      | 70%                                           | 0.79       | <b>77.5%</b>                     | 0.795        |
| Nearest neighbor | 55%                                           | 0.55       | 72.5%                            | 0.725        |
| Decision tree    | 65%                                           | 0.65       | 67.5%                            | 0.709        |
| Random Forests   | <b>70%</b>                                    | 0.741      | <b>77.5%</b>                     | <b>0.821</b> |

## ***B. Results obtained from post-relu features***

Table XXII. Accuracies from warped tumor patches using vgg-f pre-trained network

| Classifier used               | <i>Symmetric uncertainty feature selector</i> | <i>AUC</i> | <i>Relief-f feature selector</i> | <i>AUC</i> |
|-------------------------------|-----------------------------------------------|------------|----------------------------------|------------|
| Naïve bayes (5 features )     | 52.5%                                         | 0.698      | 50%                              | 0.628      |
| Naïve bayes (10 features )    | 62.5%                                         | 0.694      | 57.5%                            | 0.673      |
| Nearest neighbor(5 features)  | 55%                                           | 0.55       | 35%                              | 0.35       |
| Nearest neighbor(10 features) | 57.5%                                         | 0.575      | 45%                              | 0.45       |
| Decision tree(5 features)     | <b>65%</b>                                    | 0.625      | 47.5%                            | 0.563      |
| Decision tree(10 features)    | 52.5%                                         | 0.53       | 50%                              | 0.509      |
| Random Forests(5 features)    | 52.5%                                         | 0.596      | 52.5%                            | 0.466      |
| Random Forests(10 features)   | 40%                                           | 0.499      | 47.5%                            | 0.485      |



Table XXIII. Accuracies from cropped (40x40) tumor patches using vgg-f pre-trained network

| Classifier used               | <i>Symmetric uncertainty feature selector</i> | <i>AUC</i> | <i>Relief-f feature selector</i> | <i>AUC</i> |
|-------------------------------|-----------------------------------------------|------------|----------------------------------|------------|
| Naïve bayes (5 features )     | 35%                                           | 0.35       | 52.5%                            | 0.466      |
| Naïve bayes (10 features )    | 42.5%                                         | 0.473      | 37.5%                            | 0.402      |
| Nearest neighbor(5 features)  | 50%                                           | 0.5        | 42.5%                            | 0.425      |
| Nearest neighbor(10 features) | 57.5%                                         | 0.575      | 35%                              | 0.35       |
| Decision tree(5 features)     | <b>62.5%</b>                                  | 0.497      | 42.5%                            | 0.34       |
| Decision tree(10 features)    | 52.5%                                         | 0.407      | 30%                              | 0.306      |
| Random Forests(5 features)    | 45%                                           | 0.459      | 37.5%                            | 0.211      |
| Random Forests(10 features)   | 45%                                           | 0.473      | 25%                              | 0.211      |

Table XXIV. Accuracies from cropped (56x56) tumor patches using vgg-f pre-trained network

| Classifier used               | <i>Symmetric uncertainty feature selector</i> | <i>AUC</i> | <i>Relief-f feature selector</i> | <i>AUC</i>  |
|-------------------------------|-----------------------------------------------|------------|----------------------------------|-------------|
| Naïve bayes (5 features )     | 47.5%                                         | 0.415      | 42.5%                            | 0.405       |
| Naïve bayes (10 features )    | 57.5%                                         | 0.575      | 50%                              | 0.545       |
| Nearest neighbor(5 features)  | 60%                                           | 0.6        | <b>62.5%</b>                     | <b>0.65</b> |
| Nearest neighbor(10 features) | 62.5%                                         | 0.625      | 57.5%                            | 0.575       |
| Decision tree(5 features)     | 52.5%                                         | 0.589      | 35%                              | 0.35        |
| Decision tree(10 features)    | 47.5%                                         | 0.         | 45%                              | 0.473       |
| Random Forests(5 features)    | 47.5%                                         | 0.477      | 47.5%                            | 0.454       |
| Random Forests(10 features)   | 50%                                           | 0.5        | 47.5%                            | 0.459       |

Table XXV. Accuracies by merging warped (vgg-f) and quantitative features from [16]

| Classifier used  | <i>Symmetric uncertainty feature selector</i> | <i>AUC</i> | <i>Relief-f feature selector</i> | <i>AUC</i>   |
|------------------|-----------------------------------------------|------------|----------------------------------|--------------|
| Naïve bayes      | 75%                                           | 0.875      | <b>90%</b>                       | <b>0.935</b> |
| Nearest neighbor | 50%                                           | 0.495      | 82.5%                            | 0.825        |
| Decision tree    | 65%                                           | 0.649      | 67.5%                            | 0.784        |
| Random Forests   | 65%                                           | 0.649      | 77.5%                            | 0.883        |

Table XXVI. Accuracies by merging cropped (40x40) (vgg-f) and quantitative features from [16]

| Classifier used  | <i>Symmetric uncertainty feature selector</i> | <i>AUC</i> | <i>Relief-f feature selector</i> | <i>AUC</i> |
|------------------|-----------------------------------------------|------------|----------------------------------|------------|
| Naïve bayes      | 70%                                           | 0.81       | 72.5%                            | 0.74       |
| Nearest neighbor | 75%                                           | 0.75       | 65%                              | 0.65       |
| Decision tree    | 77.5%                                         | 0.844      | 67.5%                            | 0.553      |
| Random Forests   | <b>85%</b>                                    | 0.929      | 65%                              | 0.731      |

Table XXVII. Accuracies by merging cropped (56x56) (vgg-f) and quantitative features from [16]

| Classifier used  | <i>Symmetric uncertainty feature selector</i> | <i>AUC</i> | <i>Relief-f feature selector</i> | <i>AUC</i> |
|------------------|-----------------------------------------------|------------|----------------------------------|------------|
| Naïve bayes      | 72.5%                                         | 0.868      | 70%                              | 0.77       |
| Nearest neighbor | 70%                                           | 0.7        | 67.5%                            | 0.675      |
| Decision tree    | 70%                                           | 0.763      | 50%                              | 0.49       |
| Random Forests   | <b>77.5%</b>                                  | 0.82       | 72.5%                            | 0.773      |

Table XXVIII. Accuracies from warped tumor patches using vgg-m pre-trained network

| Classifier used               | <i>Symmetric uncertainty feature selector</i> | <i>AUC</i> | <i>Relief-f feature selector</i> | <i>AUC</i> |
|-------------------------------|-----------------------------------------------|------------|----------------------------------|------------|
| Naïve bayes (5 features )     | 42.5%                                         | 0.353      | 65%                              | 0.617      |
| Naïve bayes (10 features )    | 57.5%                                         | 0.575      | 65%                              | 0.654      |
| Nearest neighbor(5 features)  | 40%                                           | 0.4        | 52.5%                            | 0.525      |
| Nearest neighbor(10 features) | 67.5%                                         | 0.675      | 50%                              | 0.5        |
| Decision tree(5 features)     | 47.5%                                         | 0.446      | 60%                              | 0.575      |
| Decision tree(10 features)    | 62.5%                                         | 0.653      | 52.5%                            | 0.539      |
| Random Forests(5 features)    | 42.5%                                         | 0.441      | 60%                              | 0.589      |
| Random Forests(10 features)   | <b>70%</b>                                    | 0.596      | 62.5%                            | 0.666      |

Table XXIX. Accuracies from cropped (40x40) tumor patches using vgg-m pre-trained network

| Classifier used               | <i>Symmetric uncertainty feature selector</i> | <i>AUC</i> | <i>Relief-f feature selector</i> | <i>AUC</i> |
|-------------------------------|-----------------------------------------------|------------|----------------------------------|------------|
| Naïve bayes (5 features )     | 57.5%                                         | 0.524      | 50%                              | 0.525      |
| Naïve bayes (10 features )    | 57.5%                                         | 0.634      | 37.5%                            | 0.425      |
| Nearest neighbor(5 features)  | 57.5%                                         | 0.575      | 40%                              | 0.4        |
| Nearest neighbor(10 features) | 47.5%                                         | 0.475      | 45%                              | 0.45       |
| Decision tree(5 features)     | <b>82.5%</b>                                  | 0.778      | 72.5%                            | 0.645      |
| Decision tree(10 features)    | 62.5%                                         | 0.525      | 67.5%                            | 0.645      |
| Random Forests(5 features)    | 72.5%                                         | 0.804      | 70%                              | 0.724      |
| Random Forests(10 features)   | 67.5%                                         | 0.7        | 62.5%                            | 0.62       |

Table XXX. Accuracies from cropped (56x56) tumor patches using vgg-m pre-trained network

| Classifier used               | <i>Symmetric uncertainty feature selector</i> | <i>AUC</i> | <i>Relief-f feature selector</i> | <i>AUC</i> |
|-------------------------------|-----------------------------------------------|------------|----------------------------------|------------|
| Naïve bayes (5 features )     | 52.5%                                         | 0.444      | 40%                              | 0.381      |
| Naïve bayes (10 features )    | 55%                                           | 0.604      | 52.5%                            | 0.438      |
| Nearest neighbor(5 features)  | 55%                                           | 0.555      | 42.5%                            | 0.425      |
| Nearest neighbor(10 features) | 50%                                           | 0.5        | 45%                              | 0.45       |
| Decision tree(5 features)     | <b>65%</b>                                    | 0.605      | 35%                              | 0.283      |
| Decision tree(10 features)    | 47.5%                                         | 0.505      | 45%                              | 0.477      |
| Random Forests(5 features)    | 57.5%                                         | 0.566      | 40%                              | 0.4        |
| Random Forests(10 features)   | 45%                                           | 0.429      | 42.5%                            | 0.453      |

Table XXXI. Accuracies by merging warped (vgg-m) and quantitative features from [16]

| Classifier used  | <i>Symmetric uncertainty feature selector</i> | <i>AUC</i> | <i>Relief-f feature selector</i> | <i>AUC</i> |
|------------------|-----------------------------------------------|------------|----------------------------------|------------|
| Naïve bayes      | 65%                                           | 0.793      | 70%                              | 0.681      |
| Nearest neighbor | <b>87.5%</b>                                  | 0.875      | 65%                              | 0.65       |
| Decision tree    | 77.5%                                         | 0.803      | 62.5%                            | 0.581      |
| Random Forests   | 80%                                           | 0.885      | 65%                              | 0.764      |

Table XXXII. Accuracies by merging cropped (40x40) (vgg-m) and quantitative features from [16]

| Classifier used  | <i>Symmetric uncertainty feature selector</i> | <i>AUC</i> | <i>Relief-f feature selector</i> | <i>AUC</i> |
|------------------|-----------------------------------------------|------------|----------------------------------|------------|
| Naïve bayes      | 70%                                           | 0.745      | 72.5%                            | 0.798      |
| Nearest neighbor | 72.5%                                         | 0.725      | 65%                              | 0.65       |
| Decision tree    | <b>80%</b>                                    | 0.651      | 77.5%                            | 0.789      |
| Random Forests   | <b>80%</b>                                    | 0.885      | 75%                              | 0.805      |

Table XXXIII. Accuracies by merging cropped (56x56) (vgg-m) and quantitative features from [16]

| Classifier used  | <i>Symmetric uncertainty feature selector</i> | <i>AUC</i> | <i>Relief-f feature selector</i> | <i>AUC</i> |
|------------------|-----------------------------------------------|------------|----------------------------------|------------|
| Naïve bayes      | <b>77.5%</b>                                  | 0.85       | 72.5%                            | 0.735      |
| Nearest neighbor | 67.5%                                         | 0.675      | 67.5%                            | 0.675      |
| Decision tree    | 72.5%                                         | 0.778      | 55%                              | 0.638      |
| Random Forests   | <b>77.5%</b>                                  | 0.798      | 65%                              | 0.735      |

Table XXXIV. Accuracies from warped tumor patches using vgg-s pre-trained network

| Classifier used               | <i>Symmetric uncertainty feature selector</i> | <i>AUC</i> | <i>Relief-f feature selector</i> | <i>AUC</i> |
|-------------------------------|-----------------------------------------------|------------|----------------------------------|------------|
| Naïve bayes (5 features )     | 60%                                           | 0.59       | 55%                              | 0.563      |
| Naïve bayes (10 features )    | 52.5%                                         | 0.593      | 67.5%                            | 0.75       |
| Nearest neighbor(5 features)  | 47.5%                                         | 0.475      | 57.5%                            | 0.575      |
| Nearest neighbor(10 features) | 52.5%                                         | 0.525      | 60%                              | 0.6        |
| Decision tree(5 features)     | 37.5%                                         | 0.561      | 45%                              | 0.411      |
| Decision tree(10 features)    | 47.5%                                         | 0.394      | 60%                              | 0.608      |
| Random Forests(5 features)    | 60%                                           | 0.631      | 57.5%                            | 0.55       |
| Random Forests(10 features)   | 50%                                           | 0.555      | <b>70%</b>                       | 0.704      |

Table XXXV. Accuracies from cropped (40x40) tumor patches using vgg-s pre-trained network

| Classifier used               | <i>Symmetric uncertainty feature selector</i> | <i>AUC</i> | <i>Relief-f feature selector</i> | <i>AUC</i> |
|-------------------------------|-----------------------------------------------|------------|----------------------------------|------------|
| Naïve bayes (5 features )     | 30%                                           | 0.265      | 40%                              | 0.388      |
| Naïve bayes (10 features )    | 37.5%                                         | 0.383      | 32.5%                            | 0.285      |
| Nearest neighbor(5 features)  | 42.5%                                         | 0.425      | 40%                              | 0.4        |
| Nearest neighbor(10 features) | <b>60%</b>                                    | 0.6        | 40%                              | 0.4        |
| Decision tree(5 features)     | 42.5%                                         | 0.295      | 52.5%                            | 0.477      |
| Decision tree(10 features)    | 30%                                           | 0.26       | 47.5%                            | 0.464      |
| Random Forests(5 features)    | 25%                                           | 0.231      | 35%                              | 0.434      |
| Random Forests(10 features)   | 32.5%                                         | 0.314      | 37.5%                            | 0.351      |

Table XXXVI. Accuracies from cropped (56x56) tumor patches using vgg-s pre-trained network

| Classifier used               | <i>Symmetric uncertainty feature selector</i> | <i>AUC</i> | <i>Relief-f feature selector</i> | <i>AUC</i> |
|-------------------------------|-----------------------------------------------|------------|----------------------------------|------------|
| Naïve bayes (5 features )     | 50%                                           | 0.51       | 52.5%                            | 0.513      |
| Naïve bayes (10 features )    | 55%                                           | 0.515      | 47.5%                            | 0.468      |
| Nearest neighbor(5 features)  | 50%                                           | 0.5        | 52.5%                            | 0.525      |
| Nearest neighbor(10 features) | 55%                                           | 0.55       | 52.5%                            | 0.525      |
| Decision tree(5 features)     | 60%                                           | 0.505      | <b>65%</b>                       | 0.57       |
| Decision tree(10 features)    | 62.5%                                         | 0.553      | 62.5%                            | 0.619      |
| Random Forests(5 features)    | 52.5%                                         | 0.489      | 35%                              | 0.495      |
| Random Forests(10 features)   | 52.5%                                         | 0.523      | 45%                              | 0.459      |

Table XXXVII. Accuracies by merging warped (vgg-s) and quantitative features from [16]

| Classifier used  | <i>Symmetric uncertainty feature selector</i> | <i>AUC</i> | <i>Relief-f feature selector</i> | <i>AUC</i> |
|------------------|-----------------------------------------------|------------|----------------------------------|------------|
| Naïve bayes      | 70%                                           | 0.733      | 75%                              | 0.835      |
| Nearest neighbor | 72.5%                                         | 0.725      | 75%                              | 0.75       |
| Decision tree    | 62.5%                                         | 0.583      | 60%                              | 0.523      |
| Random Forests   | <b>77.5%</b>                                  | 0.877      | 67.5%                            | 0.87       |

Table XXXVIII. Accuracies by merging cropped (40x40) (vgg-s) and quantitative features from [16]

| Classifier used  | <i>Symmetric uncertainty feature selector</i> | <i>AUC</i> | <i>Relief-f feature selector</i> | <i>AUC</i> |
|------------------|-----------------------------------------------|------------|----------------------------------|------------|
| Naïve bayes      | 62.5%                                         | 0.693      | 67.5%                            | 0.723      |
| Nearest neighbor | 65%                                           | 0.65       | 72.5%                            | 0.725      |
| Decision tree    | 67.5%                                         | 0.739      | 62.5%                            | 0.604      |
| Random Forests   | 62.5%                                         | 0.735      | <b>75%</b>                       | 0.853      |

Table XXXIX. Accuracies by merging cropped (56x56) (vgg-s) and quantitative features from [16]

| Classifier used  | <i>Symmetric uncertainty feature selector</i> | <i>AUC</i> | <i>Relief-f feature selector</i> | <i>AUC</i> |
|------------------|-----------------------------------------------|------------|----------------------------------|------------|
| Naïve bayes      | 62.5%                                         | 0.725      | 72.5%                            | 0.83       |
| Nearest neighbor | 70%                                           | 0.7        | 62.5%                            | 0.625      |
| Decision tree    | 60%                                           | 0.606      | <b>87.5%</b>                     | 0.899      |
| Random Forests   | 67.5%                                         | 0.786      | 80%                              | 0.839      |

### C. Results obtained from multiple slices

TABLE XXXX. Accuracies from warped tumor patches using vgg-f pre-trained network (pre-relu features)

| Classifier used                | <i>Symmetric uncertainty feature selector</i> | <i>AUC</i> | <i>Relief-f fe30ature selector</i> | <i>AUC</i> |
|--------------------------------|-----------------------------------------------|------------|------------------------------------|------------|
| Naïve bayes (5 features )      | 62.5%                                         | 0.525      | 57.5%                              | 0.566      |
| Naïve bayes (10 features )     | 65%                                           | 0.617      | 50%                                | 0.5        |
| Nearest neighbor( 5 features)  | 62.5%                                         | 0.666      | 52.5%                              | 0.513      |
| Nearest neighbor( 10 features) | 57.5                                          | 0.575      | 55%                                | 0.638      |
| Decision tree(5 features)      | 82.5                                          | 0.778      | 72.5%                              | 0.773      |
| Decision tree(10 features)     | 80                                            | 0.651      | 70%                                | 0.724      |
| Random Forests(5 features)     | 82.5                                          | 0.778      | 70%                                | 0.724      |
| Random Forests(10 features)    | <b>85</b>                                     | 0.929      | 72.5%                              | 0.645      |

TABLE XXXXI. Accuracies from warped tumor patches using vgg-f pre-trained network (post-relu features)

| Classifier used               | <i>Symmetric uncertainty feature selector</i> | <i>AUC</i> | <i>Relief-f feature selector</i> | <i>AUC</i> |
|-------------------------------|-----------------------------------------------|------------|----------------------------------|------------|
| Naïve bayes (5 features )     | 72.5%                                         | 0.773      | 57.5%                            | 0.566      |
| Naïve bayes (10 features )    | 65%                                           | 0.654      | 55%                              | 0.638      |
| Nearest neighbor(5 features)  | 70%                                           | 0.77       | 52.5%                            | 0.489      |
| Nearest neighbor(10 features) | 60%                                           | 0.589      | 45%                              | 0.459      |
| Decision tree(5 features)     | 85%                                           | 0.929      | 70%                              | 0.724      |
| Decision tree(10 features)    | 82.5%                                         | 0.825      | 70%                              | 0.724      |
| Random Forests(5 features)    | <b>87.5%</b>                                  | 0.899      | 72.5%                            | 0.645      |
| Random Forests(10 features)   | 85%                                           | 0.929      | 65%                              | 0.617      |

TABLE XXXXIII. Accuracies by merging warped (vgg-f) –pre relu features and quantitative features from [16]

| Classifier used  | <i>Symmetric uncertainty feature selector</i> | <i>AUC</i> | <i>Relief-f feature selector</i> | <i>AUC</i> |
|------------------|-----------------------------------------------|------------|----------------------------------|------------|
| Naïve bayes      | 70%                                           | 0.77       | 72.5%                            | 0.773      |
| Nearest neighbor | 67.5%                                         | 0.675      | 70%                              | 0.724      |
| Decision tree    | <b>82.5%</b>                                  | 0.825      | 72.5%                            | 0.645      |
| Random Forests   | <b>82.5%</b>                                  | 0.825      | 75%                              | 0.75       |



TABLE XXXXIII. Accuracies by merging warped (vgg-f) –post relu features and quantitative features from [16]

| Classifier used  | <i>Symmetric uncertainty feature selector</i> | <i>AUC</i> | <i>Relief-f feature selector</i> | <i>AUC</i> |
|------------------|-----------------------------------------------|------------|----------------------------------|------------|
| Naïve bayes      | 77.5%                                         | 0.82       | 65%                              | 0.617      |
| Nearest neighbor | 70%                                           | 0.724      | 57.5%                            | 0.575      |
| Decision tree    | 87.5%                                         | 0.899      | 70%                              | 0.596      |
| Random Forests   | <b>90%</b>                                    | 0.938      | 75%                              | 0.75       |
